# Supplementary material
Source: PubMed Central journal article supplement (PMC5510646)
Supplement: NIHMS874657-supplement-1.pdf [file NIHMS874657-supplement-1.pdf]

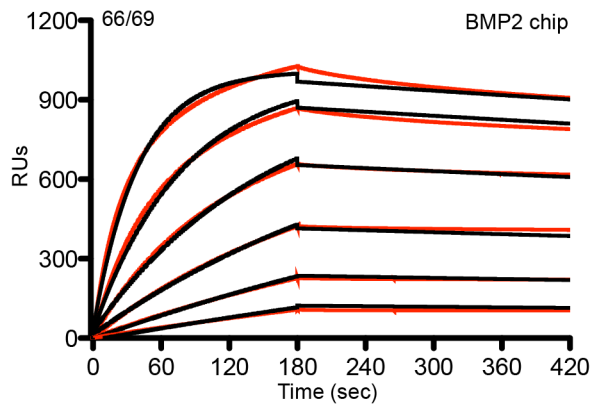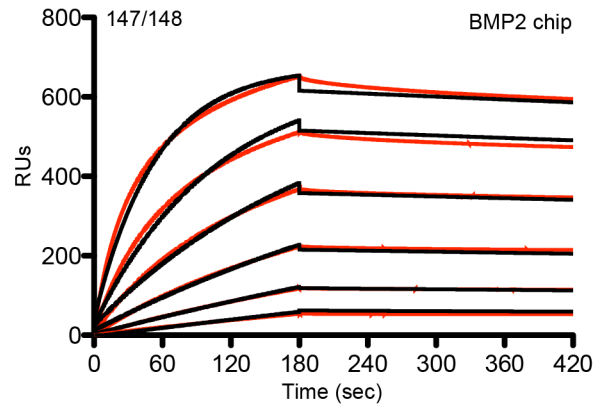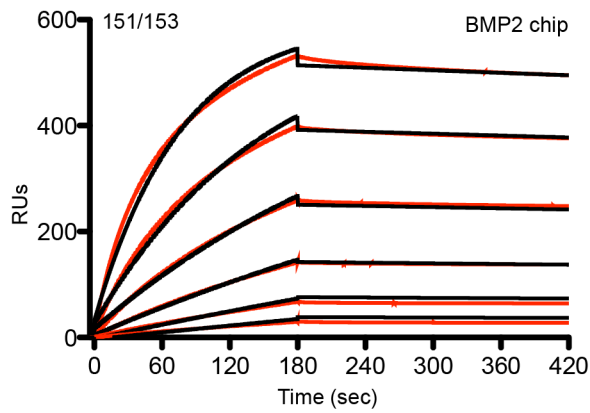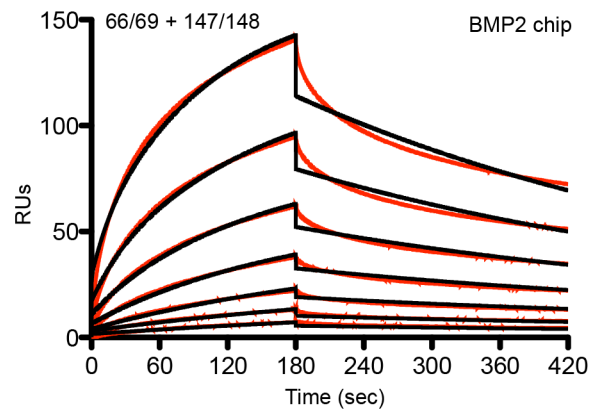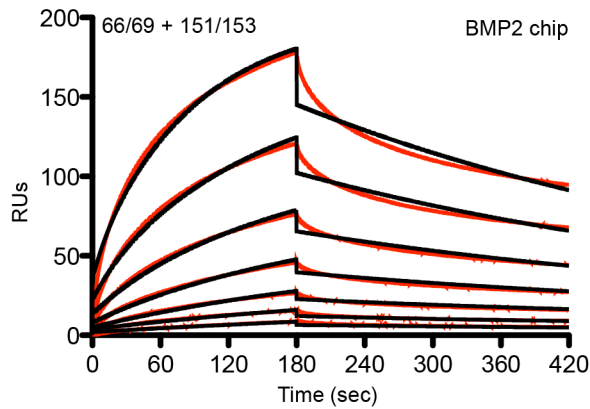

**Figure S1. SPR Binding Analysis of Grem2 Mutants Against BMP2.** SPR sensorgrams using amine coupled BMP2. Graphs show respective experimental traces (black) and corresponding fitting analysis (red) for Grem2 lysine to alanine mutants. Lysines that were mutated are indicated by numbers in the top left corner of each panel (e.g. 66/69 = K66A/K69A). RU = SPR response units.

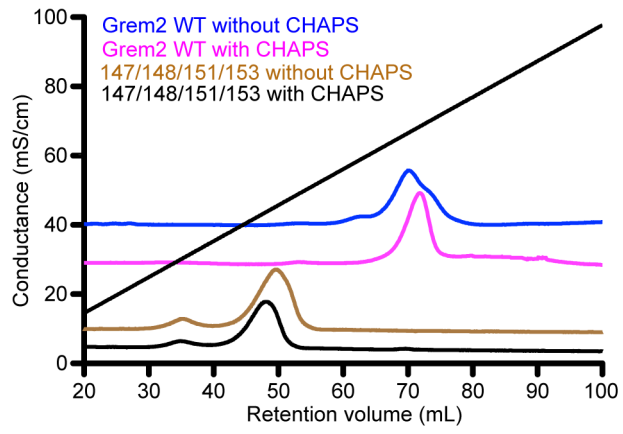

**Figure S2.** Heparin sepharose elution profiles for Grem2 WT and K147A/K148A/K151A/K153A with or without the addition of 0.5% CHAPS detergent. Black line represents the increasing concentration of NaCl throughout the elution.
